# Supplementary material
Source: publisher figshare collection journal article supplement (https://sage.figshare.com/ndownloader/files/23134160)
Supplement: Supplementary file 1 [file 23134160]

# Supplementary File

HIV testing among pregnant women with prenatal care in the United States: 2011-2017 National Survey of Family Growth.

Supplementary Table 1: Characteristics of included and excluded subpopulation, 2011-2017 NSFG

| Characteristics                    | Included Population*<br>N (weighted %) | Excluded Population**<br>N (weighted %) | P-value***   |
|------------------------------------|----------------------------------------|-----------------------------------------|--------------|
| Age                                |                                        |                                         | 0.666        |
| 15-24                              | 505 (28.8)                             | 35 (24.4)                               |              |
| 25-34                              | 825 (54.9)                             | 61 (55.4)                               |              |
| 35-44                              | 236 (16.3)                             | 18 (20.3)                               |              |
| Education                          |                                        |                                         | 0.532        |
| No high school diploma             | 289 (14.6)                             | 22 (13.8)                               |              |
| High school diploma                | 494 (28.6)                             | 34 (23.6)                               |              |
| Some college, no bachelor's degree | 450 (26.7)                             | 25 (23.6)                               |              |
| Bachelor's degree or higher        | 333 (30.2)                             | 33 (39.0)                               |              |
| Race/ethnicity                     |                                        |                                         | 0.094        |
| Non-Hispanic white                 | 616 (49.3)                             | 52 (57.7)                               |              |
| Hispanic                           | 429 (24.0)                             | 31 (21.3)                               |              |
| Non-Hispanic black                 | 380 (17.0)                             | 17 (6.0)                                |              |
| Non-Hispanic other or multiple     | 141 (9.7)                              | 14 (15.0)                               |              |
| Marital status                     |                                        |                                         | 0.351        |
| Married                            | 663 (52.3)                             | 51 (59.6)                               |              |
| Formerly married                   | 180 (9.0)                              | 10 (5.4)                                |              |
| Never married                      | 723 (38.7)                             | 53 (35.0)                               |              |
| Poverty level                      |                                        |                                         | 0.418        |
| Less than 150%                     | 864 (45.6)                             | 62 (49.2)                               |              |
| 150%-299%                          | 372 (25.0)                             | 24 (17.7)                               |              |
| 300% or above                      | 300 (29.3)                             | 28 (33.2)                               |              |
| Place of residence                 |                                        |                                         | 0.724        |
| Rural                              | 245 (16.3)                             | 11 (13.3)                               |              |
| Urban                              | 1321 (83.7)                            | 103 (86.7)                              |              |
| Birthplace                         |                                        |                                         | 0.464        |
| Foreign                            | 249 (15.7)                             | 24 (19.7)                               |              |
| United States                      | 1317 (84.3)                            | 90 (80.3)                               |              |
| Completed pregnancy                |                                        |                                         | <b>0.016</b> |
| 1                                  | 396 (25.9)                             | 42 (41.4)                               |              |
| 2                                  | 405 (27.5)                             | 35 (30.0)                               |              |
| 3 or more                          | 765 (46.6)                             | 37 (28.5)                               |              |
| PMTCT knowledge                    | N=1563                                 |                                         | 0.065        |
| No                                 | 1060 (68.3)                            | 90 (81.3)                               |              |
| Yes                                | 503 (31.7)                             | 24 (18.7)                               |              |
| Health insurance coverage (N=1565) | N=1565                                 |                                         | 0.350        |
| Yes                                | 1209 (77.4)                            | 85 (82.1)                               |              |
| No                                 | 356 (22.6)                             | 29 (17.9)                               |              |
| Total                              | 1566 (92.5)                            | 144 (7.5)                               |              |

\* Women with pregnancy ending within 12 months prior to interview that responded “Yes” or “No” to testing for HIV during prenatal care.

\*\*Women with pregnancy ending within 12 months prior to interview that responded “Never went for prenatal care” or “Don’t know” to testing for HIV during prenatal care.

\*\*\*Rao-Scott chi-square test. Bold text indicates statistical significance
